# Supplementary material
Source: MDPI journal article supplement (https://www.mdpi.com/2571-9637/7/2/22)
Supplement: s1 [file s1]

## **Supporting Information**

Tiexin Li <sup>1</sup>, Zane Datson <sup>1</sup> and Nadim Darwish <sup>1\*</sup>

<sup>1</sup> School of Molecular and Life Sciences, Curtin University, Bentley, WA 6102, Australia

\* Corresponding author.

E-mail: [nadim.darwish@curtin.edu.au](mailto:nadim.darwish@curtin.edu.au)

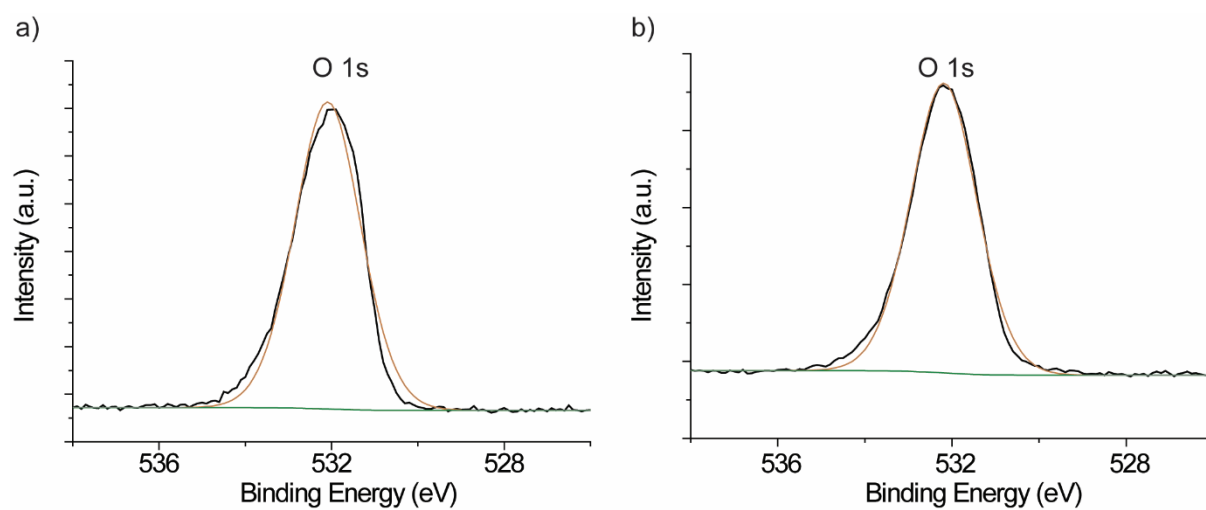

**Figure S1.** XPS high resolution O 1s spectra of SAM **S-1**, which was etched by a)  $\text{NH}_4\text{F}$ , b)  $\text{KF}$ .

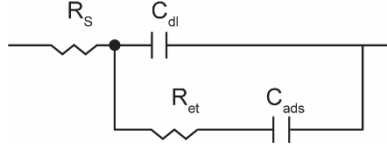

**Figure S2.** The Randles circuit used to fit the EIS data. The  $k_{et}$  is calculated according to the following equations:

$$(C_{ads})_{eff} = Q^{1/\alpha} R_e^{(1-\alpha)/\alpha}$$

In the above equations, where  $R_e$  is the global Ohmic resistance and  $Q$  and  $\alpha$  represent global properties,  $Q$  represents the differential capacity of the interface in the case where  $\alpha = 1$  and the rate constant is determined by the following equation:

$$k_{et} = \frac{1}{2R_{et}(C_{ads})_{eff}}$$

Where  $k_{et}$  is the rate constant,  $R_{et}$  is the electron transfer resistance, and  $(C_{ads})_{eff}$  is the effective pseudocapacitance.

**Table S1.** The value of best fits to the original EIS data presented in Figure 5a-b. The EIS data were interpreted by curve fitting the data to Randles circuit.

| Surface Type      | $R_{sol} (\Omega)$ | $C_{dl} (F s^{-\alpha})$         | $\alpha$<br>( $C_{dl}$ ) | $R_{et} (\Omega)$ | $C_{ads} (F s^{-\alpha})$        | $\alpha$<br>( $C_{ads}$ ) | $(C_{ads})_{eff} (F)$ | $k_{et} (s^{-1})$ |
|-------------------|--------------------|----------------------------------|--------------------------|-------------------|----------------------------------|---------------------------|-----------------------|-------------------|
| NH <sub>4</sub> F | $5.83 \pm 0.19$    | $(1.18 \pm 0.13) \times 10^{-6}$ | 0.91                     | $101.6 \pm 1.56$  | $(2.88 \pm 0.12) \times 10^{-5}$ | 0.92                      | $7.76 \times 10^{-6}$ | $634.18 \pm 9.59$ |
| KF                | $8.15 \pm 0.10$    | $(9.20 \pm 0.26) \times 10^{-7}$ | 0.94                     | $3619 \pm 153.33$ | $(9.76 \pm 0.71) \times 10^{-7}$ | 0.96                      | $3.90 \times 10^{-7}$ | $354.26 \pm 14.4$ |
